# Supplementary material
Source: publisher site journal article supplement (https://en-cdn.bio-protocol.org/attached/file/20181007/3055%20Supplementary%20File%20Table%20S1.docx)
Supplement: Supplementary file 1 [file 3055%20Supplementary%20File%20Table%20S1.docx]

**Table S1. Variable list.** This table provides a complete list of variables for the chromatography method run on the ÄKTApurifier 10 system.

| Variable list |  |  |  |  |
| --- | --- | --- | --- | --- |
| Phase | Block | Variable | Value | Unit |
| Method Settings | Main | Column | RESOURCE_Q_1_ml | |
|  |  |  |  |  |
| User Defined | Start_with_PumpWash_Purifier | Wash_Inlet_A1_ | OFF |  |
|  |  | Wash_Inlet_A2_ | OFF |  |
|  |  | Wash_Inlet_B1_ | OFF |  |
|  |  | Wash_Inlet_B2_ | OFF |  |
|  |  |  |  |  |
| User Defined | Flow_Rate | Flow_Rate | 0.500 | {ml/min} |
|  |  |  |  |  |
| User Defined | Column_Pressure_Limit | Column_PressureLimit | 1.00 | {MPa} |
|  |  |  |  |  |
| User Defined | Start_Instructions | Wavelength_1 | 280 | {nm} |
|  |  | Wavelength_2 | 254 | {nm} |
|  |  | Wavelength_3 | 215 | {nm} |
|  |  | Averaging_Time_UV | 1.28 | {sec} |
|  |  |  |  |  |
| User Defined | Eluent_A_Inlet | Pump_A_Inlet | A1 |  |
|  |  |  |  |  |
| User Defined | Eluent_B_Inlet | Pump_B_Inlet | B1 |  |
|  |  |  |  |  |
| User Defined | Start_Conc_B | Start_ConcB | 0.0 | {%B} |
|  |  |  |  |  |
| User Defined | Column_Equilibration | Equilibrate_with | 0.00 | {CV} |
|  |  |  |  |  |
| User Defined | Aut_PressureFlow_Regulation | System_Pump | Normal |  |
|  |  | System_PressLevel | 0.00 | {MPa} |
|  |  | System_MinFlow | 0.000 | {ml/min} |
|  |  |  |  |  |
| User Defined | Sample_Injection | Empty_loop_with | 10.00 | {ml} |
|  |  |  |  |  |
| User Defined | Fractionation | TubeType_EluateFrac | 12mm |  |
|  |  | Eluate_Frac_Size | 0.000 | {ml} |
|  |  | EluateFrac_StartAt | FirstTube |  |
|  |  | TubeType_PeakFrac | 12mm |  |
|  |  | Peak_Frac_Size | 0.000 | {ml} |
|  |  | PeakFrac_StartAt | FirstTube |  |
|  |  |  |  |  |
| User Defined | Linear_Gradient | Target_ConcB | 50.0 | {%B} |
|  |  | Length_of_Gradient | 25.000 | {base} |
|  |  |  |  |  |
| User Defined | Gradient_Delay | Gradient_Delay | 0.00 | {ml} |
|  |  |  |  |  |
| User Defined | Clean_after_Elution | Clean_with | 5.00 | {CV} |
|  |  |  |  |  |
| User Defined | Length_of_Reequilibration | Reequilibrate_with | 5.00 | {CV} |
